# Supplementary material for: Five-Year Predictors of Insulin Initiation in People with Type 2 Diabetes under Real-Life Conditions
Source: PubMed Central journal article supplement (PMC6169213; doi:10.1155/2018/7153087), 2018-09-19

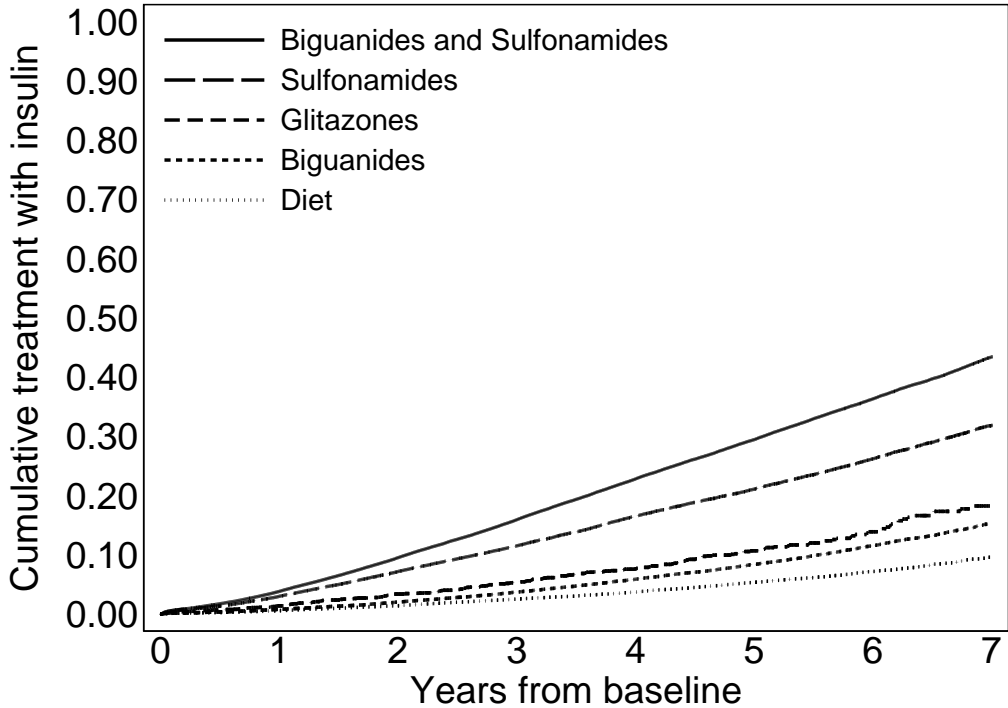

Supplement: 7153087.f2.pdf [file 7153087.f2.pdf]
